# Supplementary material for: An energy harvester based on UV-polymerized short-alkyl-chain-modified [DBU][TFSI] ionic liquid electrets
Source: Royal Society of Chemistry journal article supplement (doi:10.1039/d3ta05448a), 2023-12-11
Supplement: d3ta05448a1.pdf [file d3ta05448a1.pdf]

# Energy harvester based on UV-polymerized short-alkyl-chain-modified [DBU][TFSI] ionic liquid electrets

## Supplementary information

Topias Järvinen<sup>a</sup>, Nemanja Vucetic<sup>b</sup>, Petra Palvölgyi<sup>a</sup>, Olli Pitkänen<sup>a</sup>, Tuomo Siponkoski<sup>a</sup> Helene Cabaud<sup>b</sup>, Robert Vajtai<sup>c</sup> Jyri-Pekka Mikkola<sup>b,d</sup>, Krisztian Kordas<sup>a</sup>

<sup>a</sup> Microelectronics Research Unit, Faculty of Information Technology and Electrical Engineering, University of oulu, FI-90014 Oulu, Finland

<sup>b</sup> Laboratory of Industrial Chemistry and Reaction Engineering, Åbo Akademi University, Henrikinkatu 2, Turku/Åbo 20500, Finland; E-mail: nvucetic@abo.fi

<sup>c</sup> Department of Material Science and NanoEngineering, Rice University, Houston, Texas 77005, United States.

<sup>d</sup> Technical Chemistry, Department of Chemistry, Umeå University, SE-90187 Umeå, Sweden

## Characterization results

### 1-ethyl-1, 8-diazobicyclo [5.4.0] undec-7-ene bis(trifluoromethane)sulfonamide [DBU-C2]TFSI

Transparent liquid; Yield 89.5 %; <sup>1</sup>H NMR (500 MHz, CDCl<sub>3</sub>) δ = 3.63-3.61 (t, 2H), 3.55-3.52 (m, 4H), 3.50-3.48 (t, 2H), 2.82-2.80 (t, 2H), 2.14-2.09 (quint, 2H), 1.82-1.71 (m, 6H), 1.28-1.25 (t, 3H) ppm. <sup>13</sup>C NMR (500 MHz, CDCl<sub>3</sub>) δ = 166.29, 121.18, 55.19, 49.03, 48.96, 46.29, 28.49, 28.07, 25.91, 22.85, 19.89, 13.43 ppm. Water content: 348 ppm. Elemental analysis for C<sub>13</sub>H<sub>21</sub>F<sub>6</sub>N<sub>3</sub>O<sub>4</sub>S<sub>2</sub> (M = 461.44 g mol<sup>-1</sup>) calculated (%): C 33.84, H 4.59, N 9.11, S 13.90 and found (%): C 34.11, H 3.99, N 9.38, S 14.02.

### 1-butyl-1, 8-diazobicyclo [5.4.0] undec-7-ene bis(trifluoromethane)sulfonamide [DBU-C4]TFSI

Yellowish liquid; Yield 93.0 %; <sup>1</sup>H NMR (500 MHz, CDCl<sub>3</sub>) δ = 3.64-3.62 (t, 2H), 3.56-3.53 (t, 2H), 3.52-3.49 (t, 2H), 3.47-3.44 (t, 2H), 2.82-2.80 (t, 2H), 2.14-2.09 (quint, 2H), 1.83-1.72 (m, 6H), 1.64-1.57 (m, 2H), 1.39-1.32 (dq, 2H), 0.97-0.94 (t, 3H) ppm; <sup>13</sup>C NMR (500 MHz, CDCl<sub>3</sub>) δ = 166.42, 121.18, 55.26, 53.98, 49.09, 47.07, 30.54, 28.48, 28.26, 25.90, 22.98, 19.90, 19.72, 13.55 ppm. Water content: 673 ppm. Elemental analysis for C<sub>15</sub>H<sub>25</sub>F<sub>6</sub>N<sub>3</sub>O<sub>4</sub>S<sub>2</sub> (M = 489.50 g mol<sup>-1</sup>) calculated (%): C 36.81, H 5.15, N 8.58, S 13.10 and found (%): C 36.45, H 4.78, N 9.08, S 13.08.

### 1-hexyl-1, 8-diazobicyclo [5.4.0] undec-7-ene bis (trifluoromethane) sulfonamide [DBU-C6]TFSI

Yellowish liquid; Yield 93.2 %; <sup>1</sup>H NMR (500 MHz, CDCl<sub>3</sub>) δ = 3.65-3.63 (t, 2H), 3.58-3.53 (t, 2H), 3.53-3.48 (t, 2H), 3.48-3.42 (t, 2H), 2.14-2.10 (quint, 2H), 1.82-1.72 (m, 8H), 1.63-1.60 (t, 2H), 1.31 (s, 6H), 0.91-0.88 (t, 3H) ppm; <sup>13</sup>C NMR (500 MHz, CDCl<sub>3</sub>) δ = 166.47, 121.15, 55.28, 54.23, 49.07, 47.06, 38.51, 31.23, 28.55, 28.30, 26.13, 25.93, 23.09, 22.40, 19.96, 13.88 ppm. Water content: 890 ppm. Elemental analysis for C<sub>17</sub>H<sub>29</sub>F<sub>6</sub>N<sub>3</sub>O<sub>4</sub>S<sub>2</sub> (M = 517.55 g mol<sup>-1</sup>) calculated (%): C 39.45, H 5.65, N 8.12, S 12.39 and found (%): C 38.18, H 4.92, N 8.87, S 12.08.

Table S1. Ionogel structure and synthesis optimization.

| No.  | Ionic liquid |                  | Polymer                         |                   |                     | Conditions                     |
|------|--------------|------------------|---------------------------------|-------------------|---------------------|--------------------------------|
|      | [DBU- X]TFSI | IL in ionogel, % | (Monomer+Initiator)/ Ionogel, % | Monomer amount, % | Initiator amount, % |                                |
| 1    | None         | 0 %              | PEGDA, 100 %                    | 99.9              | 0.1 %               | 7'stirr, 5'UV, Air             |
| 2    | None         | 0 %              | PEGDA, 100 %                    | 99                | 1.0 %               | 7'stirr, 5'UV, Air             |
| 3    | None         | 0 %              | TPPTA, 100 %                    | 99                | 1.0 %               | 10'stirr, 5'UV, Air            |
| 4    | None         | 0 %              | PEGDA/TPPTA, 1/1, 100 %         | 99                | 1.0 %               | 10'stirr, 5'UV, Air            |
| 5.1  | [DBU-C2]TFSI | 0.1 %            | PEGDA, 99.9 %                   | 99                | 1.0 %               | 30'stirr, 5'UV, N <sub>2</sub> |
| 5.2  | [DBU-C2]TFSI | 0.1 %            | PEGDA, 99.9 %                   | 99.9              | 1.0 %               | 30'stirr, 5'UV, N <sub>2</sub> |
| 6.1  | [DBU-C2]TFSI | 1.0 %            | PEGDA, 99 %                     | 99                | 1.0 %               | 30'stirr, 5'UV, N <sub>2</sub> |
| 6.2  | [DBU-C2]TFSI | 1.0 %            | PEGDA, 99 %                     | 99                | 1.0 %               | 30'stirr, 5'UV, N <sub>2</sub> |
| 7.1  | [DBU-C2]TFSI | 5.0 %            | PEGDA, 95 %                     | 99                | 1.0 %               | 30'stirr, 5'UV, N <sub>2</sub> |
| 7.2  | [DBU-C2]TFSI | 5.0 %            | PEGDA, 95 %                     | 99                | 1.0 %               | 30'stirr, 5'UV, N <sub>2</sub> |
| 8.1  | [DBU-C2]TFSI | 10.0 %           | PEGDA, 90 %                     | 99                | 1.0 %               | 30'stirr, 5'UV, N <sub>2</sub> |
| 8.2  | [DBU-C2]TFSI | 10.0 %           | PEGDA, 90 %                     | 99                | 1.0 %               | 30'stirr, 5'UV, N <sub>2</sub> |
| 9.1  | [DBU-C2]TFSI | 50.0 %           | PEGDA, 50 %                     | 99                | 1.0 %               | 30'stirr, 5'UV, N <sub>2</sub> |
| 9.2  | [DBU-C2]TFSI | 50.0 %           | PEGDA, 50 %                     | 99                | 1.0 %               | 30'stirr, 5'UV, N <sub>2</sub> |
| 10.1 | [DBU-C2]TFSI | 40.0             | PEGDA, 60 %                     | 99                | 1.0 %               | 30'stirr, 5'UV, Air            |
| 10.2 | [DBU-C2]TFSI | 40.0             | PEGDA, 60 %                     | 99                | 1.0 %               | 30'stirr, 5'UV, Air            |
| 11.1 | [DBU-C2]TFSI | 40.0             | PEGDA, 60 %                     | 99                | 1.0 %               | 30'stirr, 5'UV, Air            |
| 11.2 | [DBU-C2]TFSI | 40.0             | PEGDA, 60 %                     | 99                | 1.0 %               | 30'stirr, 5'UV, Air            |

|      |              |      |                        |    |       |                        |
|------|--------------|------|------------------------|----|-------|------------------------|
| 12.1 | [DBU-C2]TFSI | 40.0 | PEGDA/TPPTA, 1/1, 60 % | 99 | 1.0 % | 30'stirr,<br>5'UV, Air |
| 12.2 | [DBU-C2]TFSI | 40.0 | PEGDA/TPPTA, 1/1, 60 % | 99 | 1.0 % | 30'stirr,<br>5'UV, Air |
| 13.1 | [DBU-C2]TFSI | 40.0 | PEGDA/TPPTA, 3/1, 60 % | 99 | 1.0 % | 30'stirr,<br>5'UV, Air |
| 13.2 | [DBU-C2]TFSI | 40.0 | PEGDA/TPPTA, 3/1, 60 % | 99 | 1.0 % | 30'stirr,<br>5'UV, Air |
| 14.1 | [DBU-C2]TFSI | 40.0 | PEGDA/TPPTA, 1/3, 60 % | 99 | 1.0 % | 30'stirr,<br>5'UV, Air |
| 14.2 | [DBU-C2]TFSI | 40.0 | PEGDA/TPPTA, 1/3, 60 % | 99 | 1.0 % | 30'stirr,<br>5'UV, Air |
| 15.1 | [DBU-C2]TFSI | 40.0 | PEGDA/TPPTA, 4/1, 60 % | 99 | 1.0 % | 30'stirr,<br>5'UV, Air |
| 15.2 | [DBU-C2]TFSI | 40.0 | PEGDA/TPPTA, 4/1, 60 % | 99 | 1.0 % | 30'stirr,<br>5'UV, Air |
| 16.1 | [DBU-C2]TFSI | 40.0 | PEGDA/TPPTA, 9/1, 60 % | 99 | 1.0 % | 30'stirr,<br>5'UV, Air |
| 17.2 | [DBU-C2]TFSI | 40.0 | PEGDA/TPPTA, 9/1, 60 % | 99 | 1.0 % | 30'stirr,<br>5'UV, Air |
| 17.1 | [DBU-C2]TFSI | 15.0 | PEGDA, 85 %            | 99 | 1.0 % | 30'stirr,<br>5'UV, Air |
| 18.2 | [DBU-C2]TFSI | 15.0 | PEGDA, 85 %            | 99 | 1.0 % | 30'stirr,<br>5'UV, Air |
| 19.1 | [DBU-C2]TFSI | 20.0 | PEGDA, 80 %            | 99 | 1.0 % | 30'stirr,<br>5'UV, Air |
| 19.2 | [DBU-C2]TFSI | 20.0 | PEGDA, 80 %            | 99 | 1.0 % | 30'stirr,<br>5'UV, Air |
| 20.1 | [DBU-C4]TFSI | 10.0 | PEGDA, 90 %            | 99 | 1.0 % | 30'stirr,<br>5'UV, Air |
| 20.2 | [DBU-C4]TFSI | 10.0 | PEGDA, 90 %            | 99 | 1.0 % | 30'stirr,<br>5'UV, Air |
| 21.1 | [DBU-C6]TFSI | 10.0 | PEGDA, 90 %            | 99 | 1.0 % | 30'stirr,<br>5'UV, Air |
| 21.2 | [DBU-C6]TFSI | 10.0 | PEGDA, 90 %            | 99 | 1.0 % | 30'stirr,<br>5'UV, Air |

# Ionogel preparation

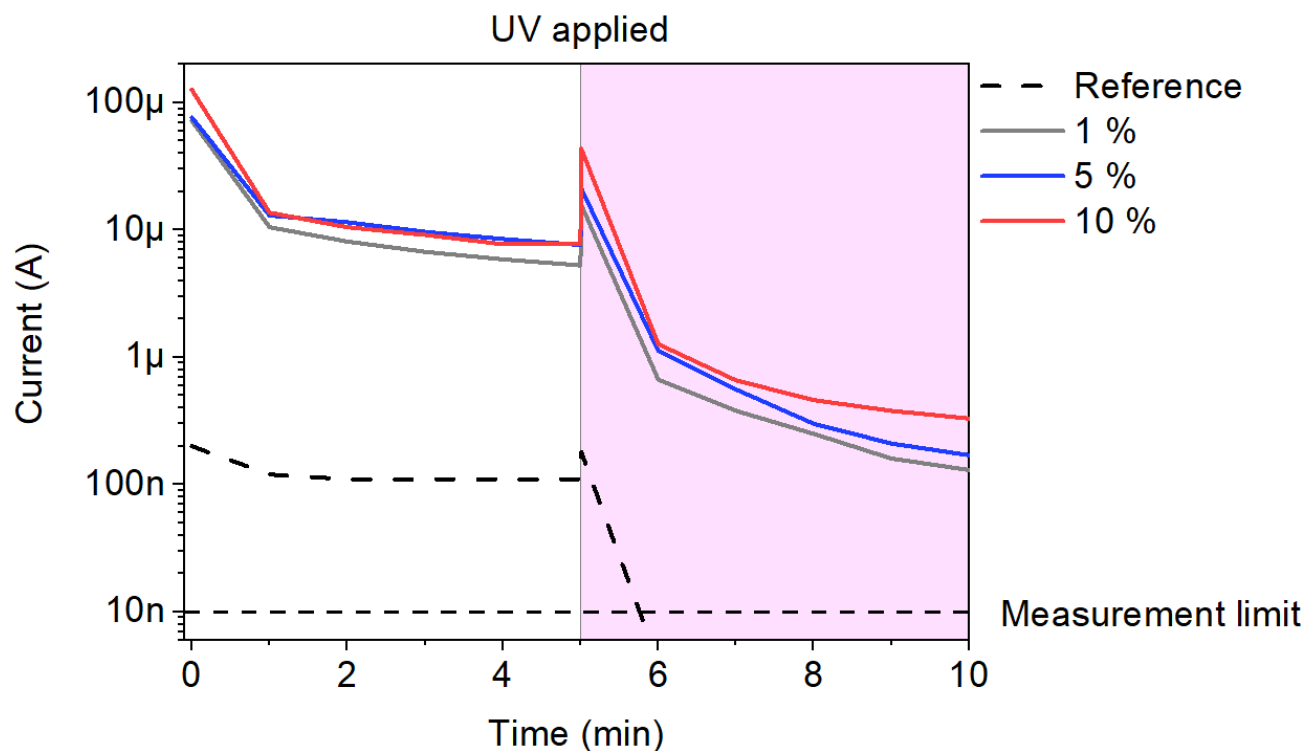

Figure S1: Polymer curing currents for reference, 1, 5 and 10 wt. % samples. UV is applied after 5 minutes.

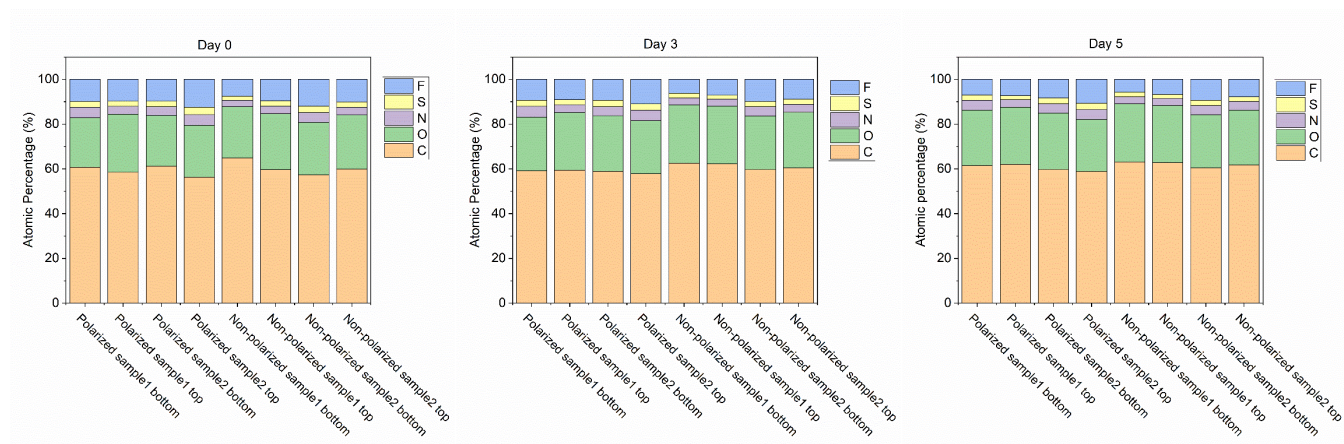

Figure S2: Surface elemental concentration of different electrets 10 wt. % [DBU-C4][TFSI] with and without polarization at 2.5 V potential measured with X-ray photoelectron spectroscopy (XPS).
